# Supplementary material for: Fabrication of high-performance flexible photodetectors based on Zn-doped MoS2/graphene hybrid fibers
Source: Royal Society of Chemistry journal article supplement (doi:10.1039/c7tc04274d), 2017-01-01
Supplement: c7tc04274d1.pdf [file c7tc04274d1.pdf]

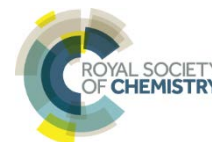

## Supporting Information

### COMMUNICATION

#### Fabrication of high-performance flexible photodetectors based on Zn-doped MoS<sub>2</sub>/graphene hybrid fibers

Received 00th January 20xx,  
Accepted 00th January 20xx

DOI: 10.1039/x0xx00000x

[www.rsc.org/](http://www.rsc.org/)

Seong Jun Kim,<sup>a</sup> Min-A Kang,<sup>a,b</sup> In-su Jeon,<sup>a</sup> Seulki Ji,<sup>a</sup> Wooseok Song,<sup>a</sup> Sung Myung,<sup>a,\*</sup> Sun Sook Lee,<sup>a</sup> Jongsun Lim,<sup>a</sup> Ki-Seok An<sup>a</sup>

<sup>a</sup> Thin Film Materials Research Center, Korea Research Institute of Chemical Technology, Daejeon 305-600, Republic of Korea, E-mail: [msung@kRICT.re.kr](mailto:msung@kRICT.re.kr)

<sup>b</sup> Department of Energy Science, Sungkyunkwan University, Suwon, Gyeonggi-do 440-746, Republic of Korea

### Experimental Section

#### Preparation of GO thin film and GO fibers

Graphene oxide (GO) was synthesized from natural graphite via a modified Hummer's method. Natural graphite flakes (Sigma Aldrich) were oxidized using NaNO<sub>3</sub>, H<sub>2</sub>SO<sub>4</sub>, KMnO<sub>4</sub>, and H<sub>2</sub>O<sub>2</sub>, and the as-synthesized GO was washed several times by centrifugation. The GO sheets were exfoliated by ultra-sonication. GO solution (20 mg) in 20 ml distilled water was spin-coated onto a SiO<sub>2</sub> substrate at 2000 rpm for 30s to prepare GO film. The reduced GO film was formed by heating at 600°C with a flow of Ar for 5 mins. For the preparation of GO fiber, a glass pipe with an inner diameter of 1.5 mm was utilized. The GO solution with a high concentration was injected into the glass pipe, which was then sealed at both ends with polyimide tape and heated to 80°C for 12 h. Water was then injected into the pipe to delaminate rGO fibers.

#### CVD Growth of MoS<sub>2</sub> Layer on GO thin film and GO fibers

A layer of *p*-THPP was deposited on the GO layer and GO fibers by thermal evaporation, and metalation of the *p*-THPP layer was carried out by introducing diethylzinc (DEZ) as a metal precursor in the atomic layer deposition (ALD) process. The Mo solution was prepared by dissolving 0.1 M ammonium heptamolybdate (Fluca, 99%) in 10 mL of distilled water. The solution was coated onto SiO<sub>2</sub> substrates by spin-coating at 2,000 rpm for 30 s. 0.1 g of sulfur powder (SAMCHUN, 98.0%) as the sulfur source was located upstream in the reactor. The distance between the sulfur and Mo sources was 19 cm. MoS<sub>2</sub> nanosheets were synthesized at 600°C under ~2 Torr while introducing Ar gas (500 sccm) for 5 min.

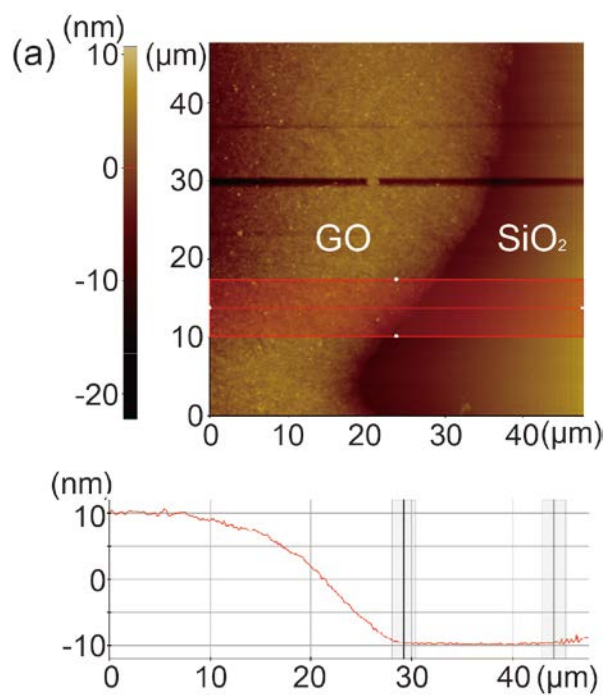

**Figure S1.** (a) AFM image of GO film spin-coated (2 cycles) on SiO<sub>2</sub>

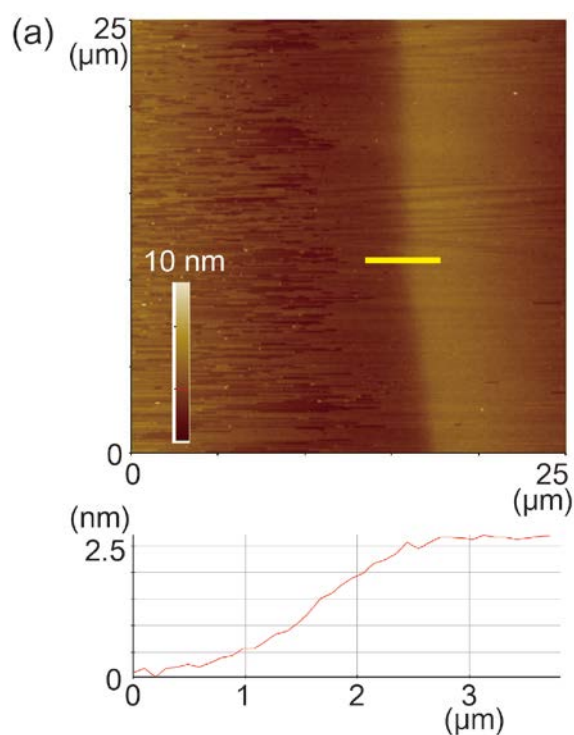

**Figure S2.** AFM image of the spin-coated *p*-THPP layer.

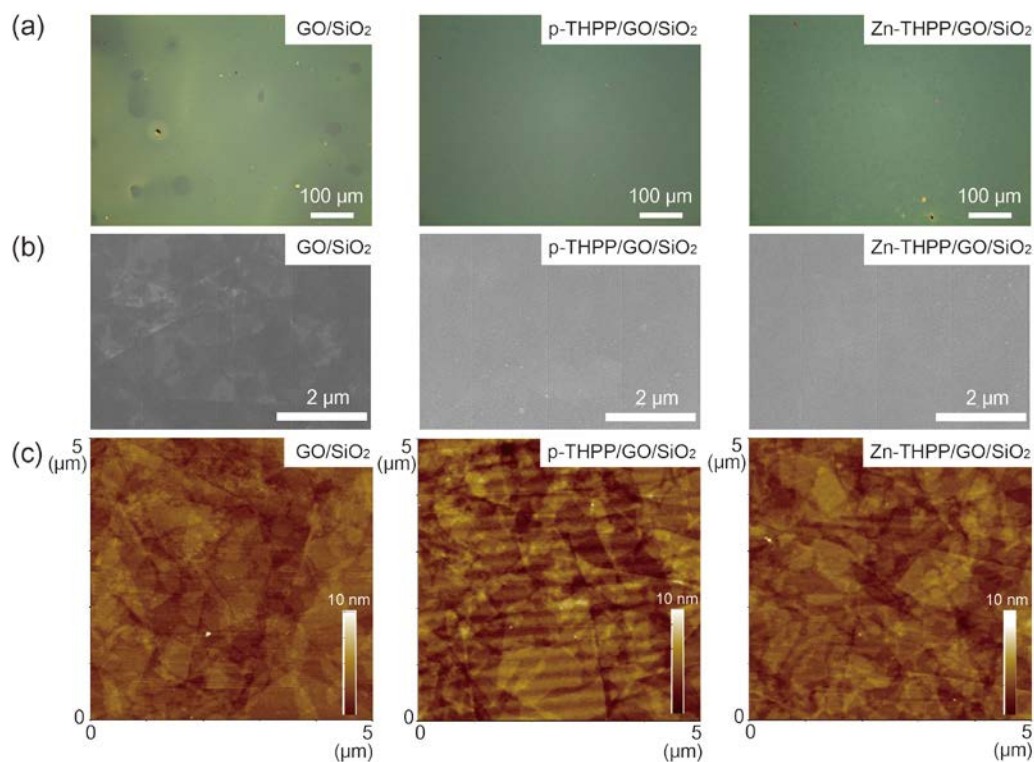

**Figure S3.** (a) Optical, (b) SEM, and (c) AFM images of GO/SiO<sub>2</sub>, *p*-THPP/GO/SiO<sub>2</sub>, and Zn-THPP/SiO<sub>2</sub>, respectively.

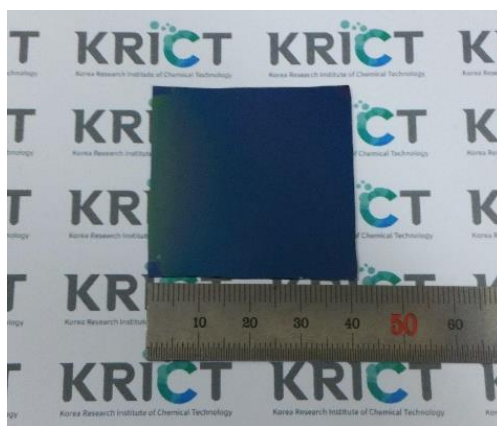

**Figure S4.** Photograph of as-grown MoS<sub>2</sub> nanosheets on rGO film (4 x 4 cm<sup>2</sup>).

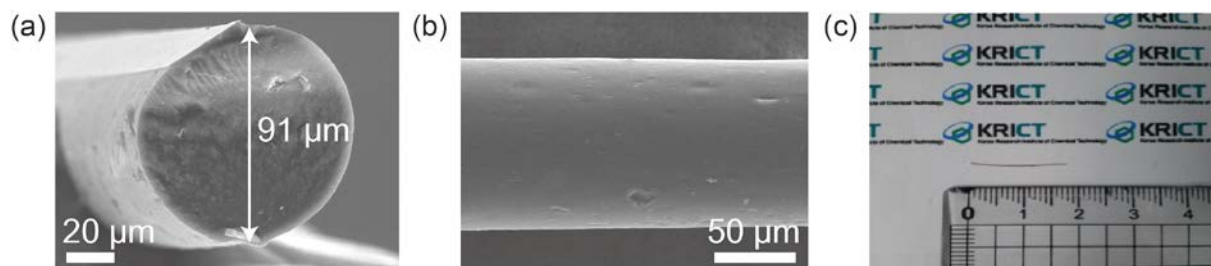

**Figure S5.** (a) Cross-section SEM image of as-fabricated GO fiber. (b) Top view SEM image of as-fabricated GO fiber. (c) Real image of as fabricated GO fiber.

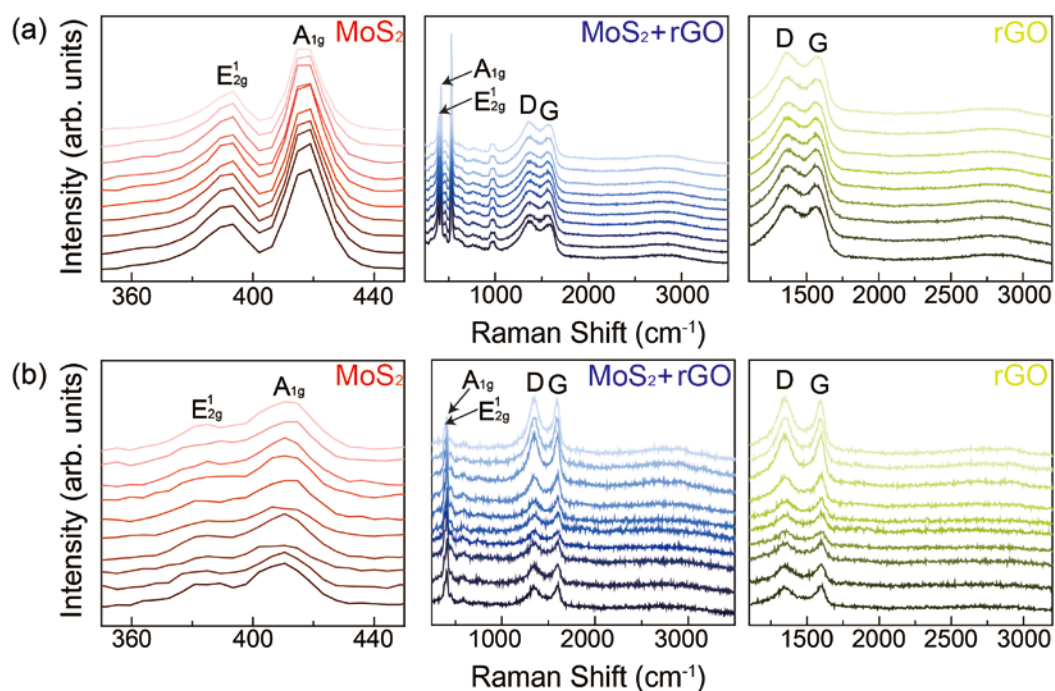

**Figure S6.** Raman spectra recorded from different positions of on (a) Zn-doped MoS<sub>2</sub> on rGO TF, and (b) Zn-doped MoS<sub>2</sub> on rGO fiber.

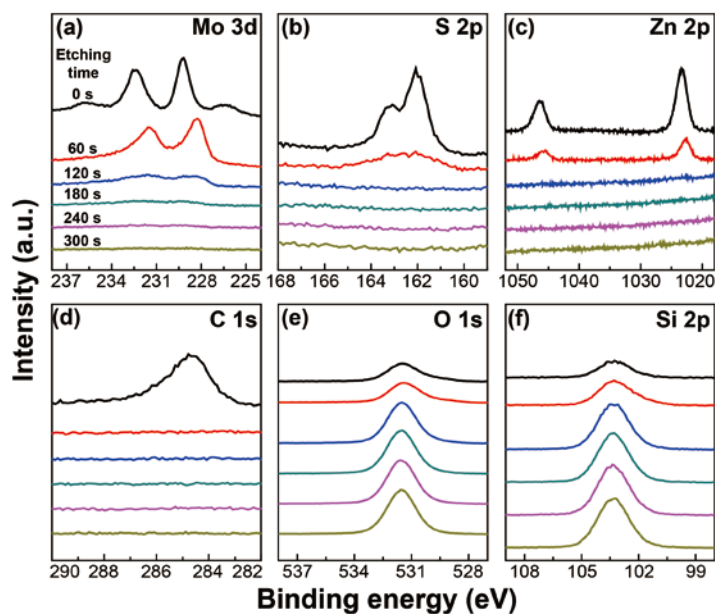

**Figure S7.** XPS depth profiles of the (a) Mo 3d, (b) S 2p, (c) Zn 2p, (d) C 1s, (e) O 1s and (f) Si 2p core level spectra for Zn-doped MoS<sub>2</sub> film as a function of etching time.

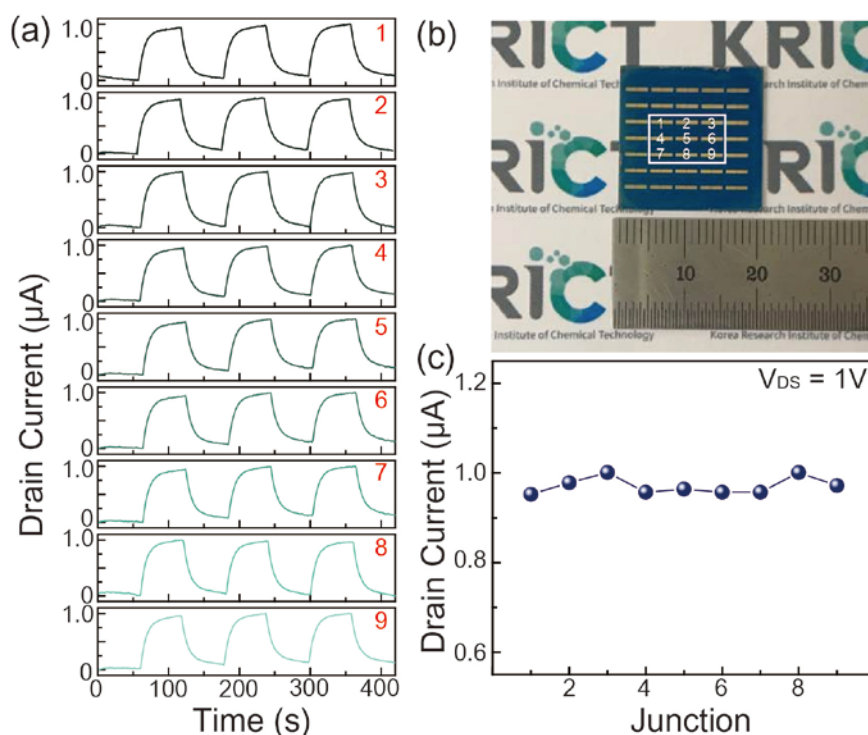

**Figure S8.** (a) Photoreponse characteristics of the device based on the Zn-doped MoS<sub>2</sub>-rGO (DEZ injection time : 80 s) over 9 junctions, (b) photograph showing 9 junctions in the Zn-doped MoS<sub>2</sub>-rGO/SiO<sub>2</sub>-based device, and (c) plot of the drain current of junctions under light illumination.

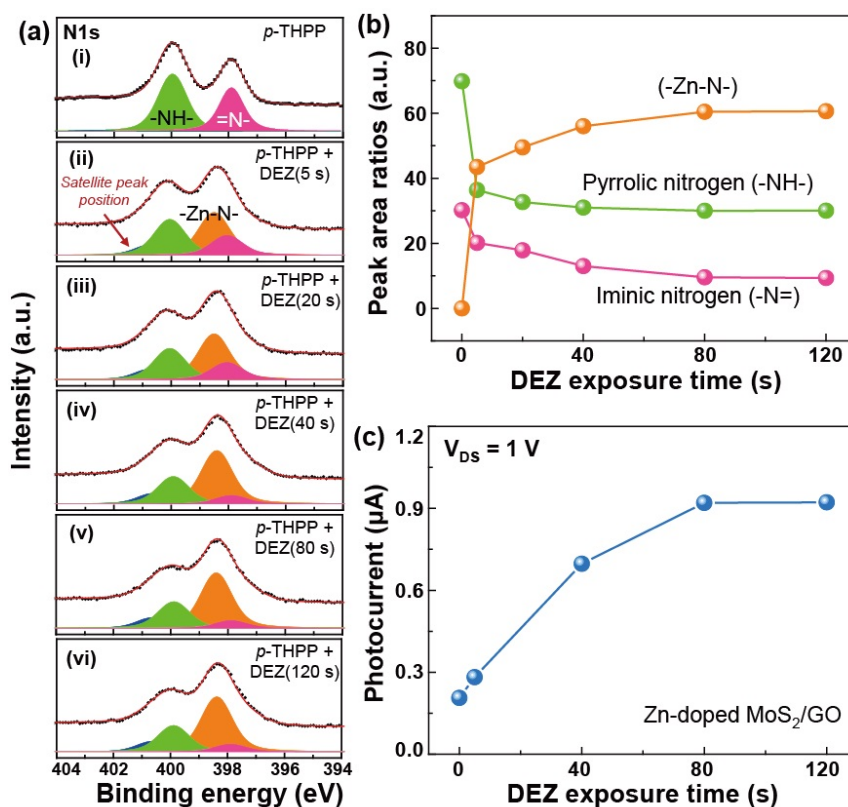

**Figure S9.** (a) XPS spectra of N 1s core level for (i) p-THPP thin films, Zn(II)THPP thin films formed by introducing Zn precursor for (ii-vi) 5, 20, 40, 80, and 120 s. (b) Plots for the peak area ratios of -NH-, -N= and -Zn-N- extracted from N 1s core level spectra as a function of DEZ exposure time. (c) The photocurrent of the devices based on Zn-doped MoS<sub>2</sub>/GO nanosheets as a function of DEZ exposure time.

**Table S1.** Photodetector performance for the Zn-doped MoS<sub>2</sub>/graphene hybrid fibers to other references.

|          | Year | Wavelength (nm) | Bias voltage (V) | Power density            | Responsivity (A/W)   |
|----------|------|-----------------|------------------|--------------------------|----------------------|
| Ref. 1   | 2014 | 632.8 nm        | 0.1 V            | 0.645 μW/cm <sup>2</sup> | 10 <sup>4</sup> mA/W |
| Ref. 2   | 2014 | 850 nm          | 0.1 V            | 1 mW/cm <sup>2</sup>     | 8 mA/W               |
| Ref. 3   | 2015 | 1440 nm         | 2 V              | 0.4 mW/cm <sup>2</sup>   | 1.26 A/W             |
| Ref. 4   | 2016 | 514 nm          | -2 V             | 3 mW/cm <sup>2</sup>     | ~25 mA/W             |
| Ref. 5   | 2017 | 540 nm          | 5 V              | 0.1 mW/cm <sup>2</sup>   | 40 mA/W              |
| Our work | 2017 | visible         | 2 V              | 125.2 W/m <sup>2</sup>   | 5.73A/W              |

Ref. [S1] H. Xu, J. Wu, Q. Feng, N. Mao, C. Wang and J. Zhang, *Small*, 2014, **10**, 2300-2306.

- Ref. [S2] C. G. Kang, S. K. Lee, T. J. Yoo, W. Park, U. Jung, J. Ahn and B. H. Lee, *Appl. Phys. Lett.* 2014, **104**, 161902.
- Ref. [S3] P. Vabbina, N. Choudhary, A.-A. Chowdhury, R. Sinha, M. Karabiyik, S. Das, W. Choi and N. Pala, *ACS Appl. Mater. Interfaces*, 2015, **7**, 15206-15213.
- Ref. [S4] A. Midya, A. Ghorai, S. Mukherjee, R. Maiti and S. K. Ray, *J. Mater. Chem. A*, 2016, **4**, 4534-4543.
- Ref. [S5] Q. Liu, B. Cook, M. Gong, Y. Gong, D. Ewing, M. Casper, A. Stramel and J. Wu, *ACS Appl. Mater. Interfaces*, 2017, **9**, 12728-12733.
